# Supplementary material for: Comparison of Highly Resolved Model-Based Exposure Metrics for Traffic-Related Air Pollutants to Support Environmental Health Studies
Source: MDPI journal article supplement (doi:10.3390/ijerph121215007), 2015-12-08
Supplement: s1 [file s1]

## Comparison of Highly Resolved Model-Based Exposure Metrics for Traffic-Related Air Pollutants to Support Environmental Health Studies

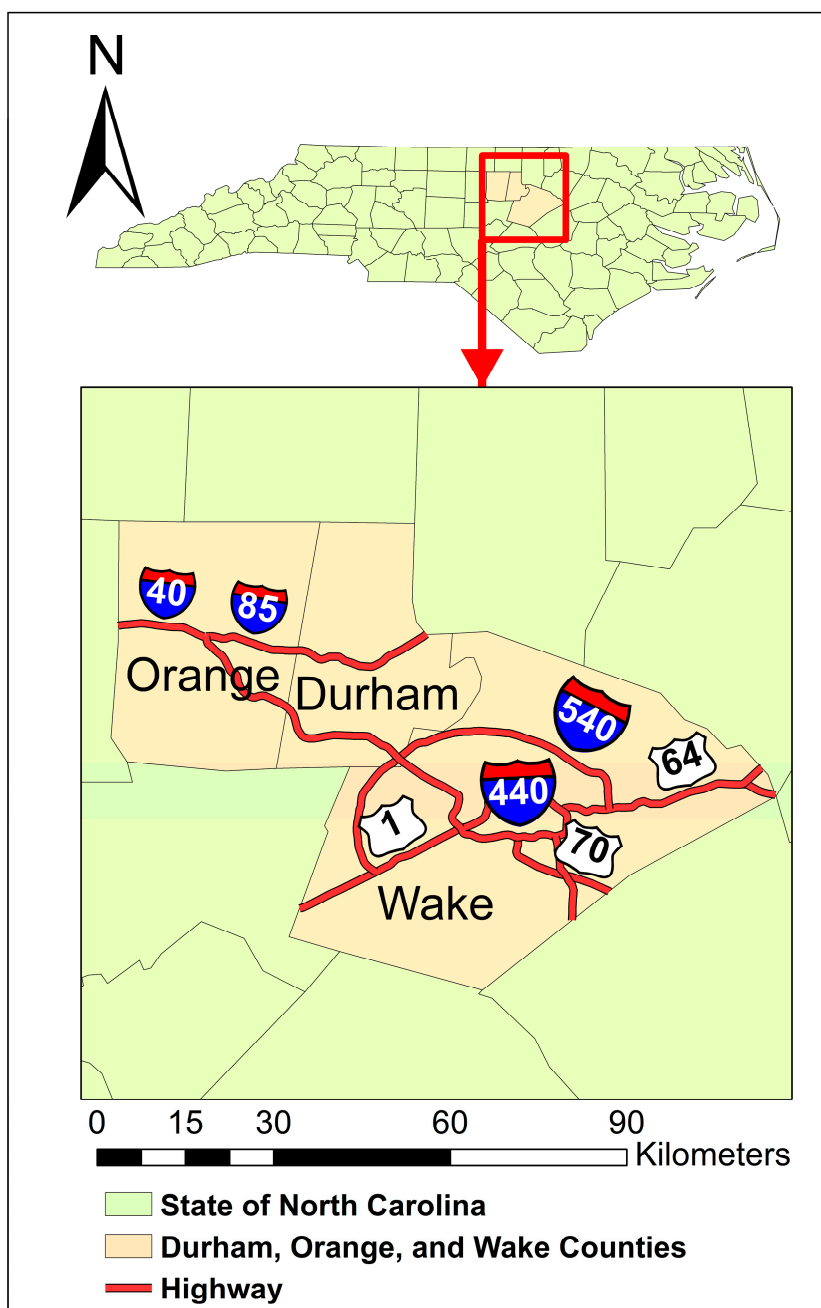

**Figure S1.** The modeling domain in Durham, Orange, and Wake Counties.

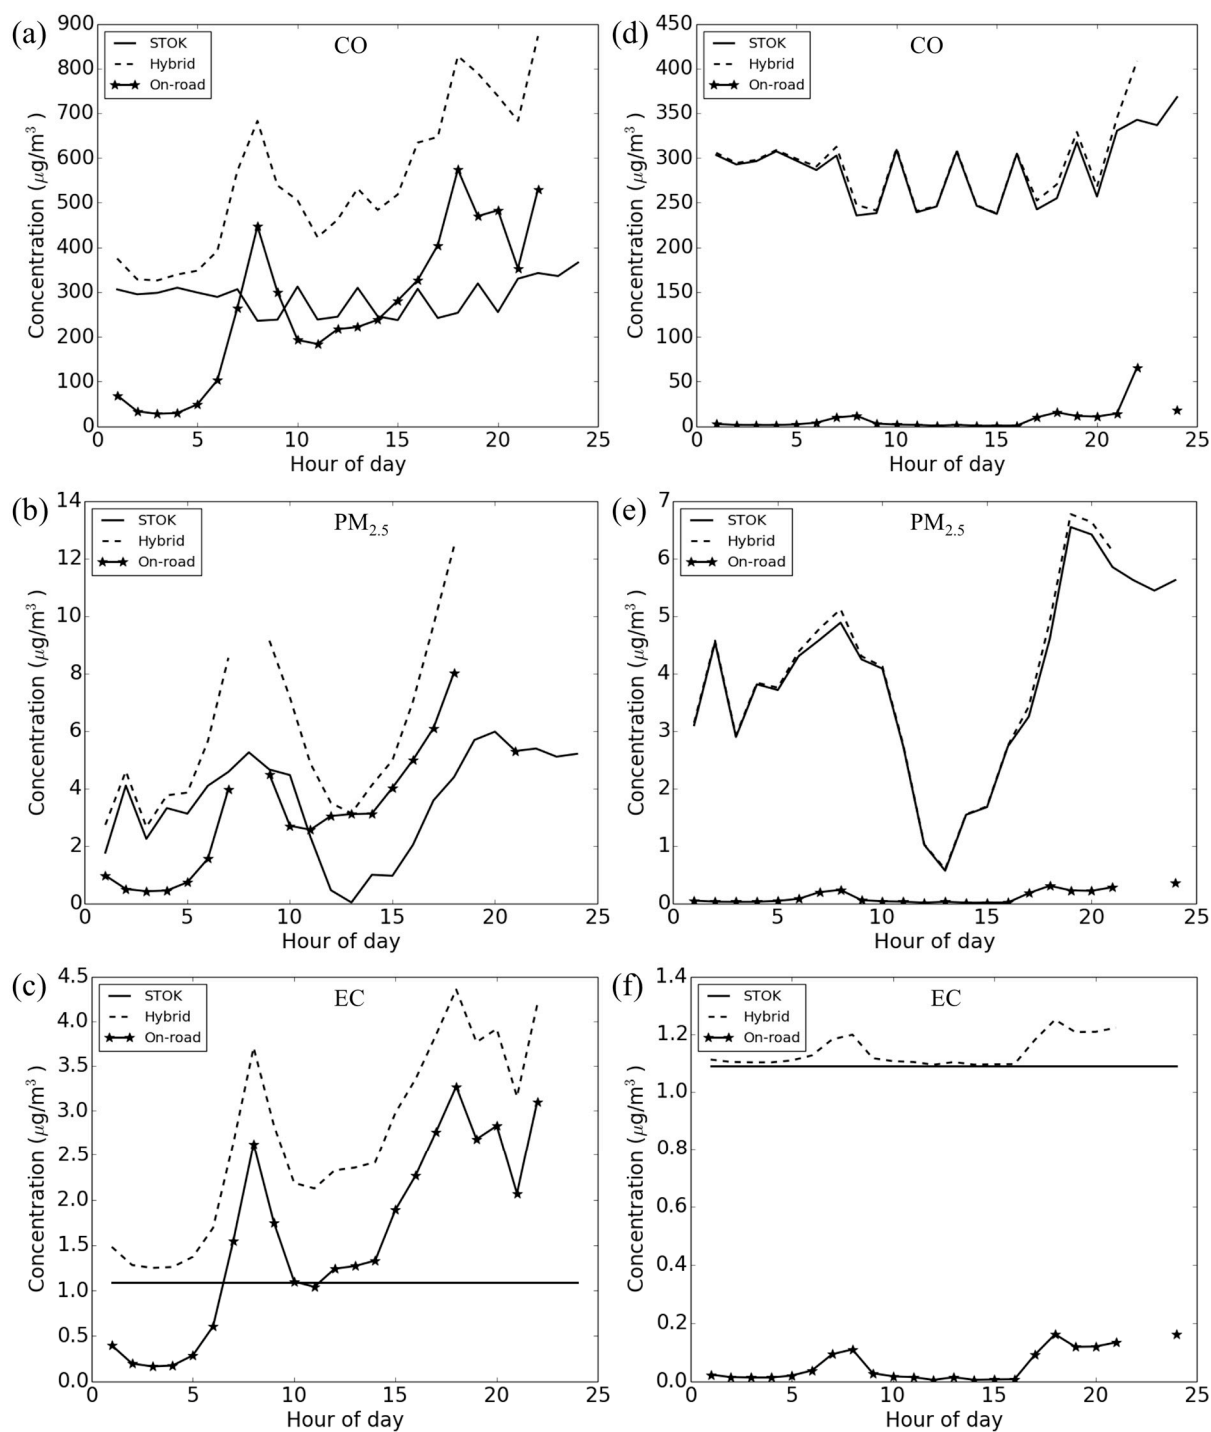

**Figure S2.** Time series plot on January 3rd for CO (a,d); PM<sub>2.5</sub> (b,e); and EC (c,f) at a near-road Census block (14.07m from roadway, **left panels**) and a remote Census block (9.57 km from roadway, **right panels**).

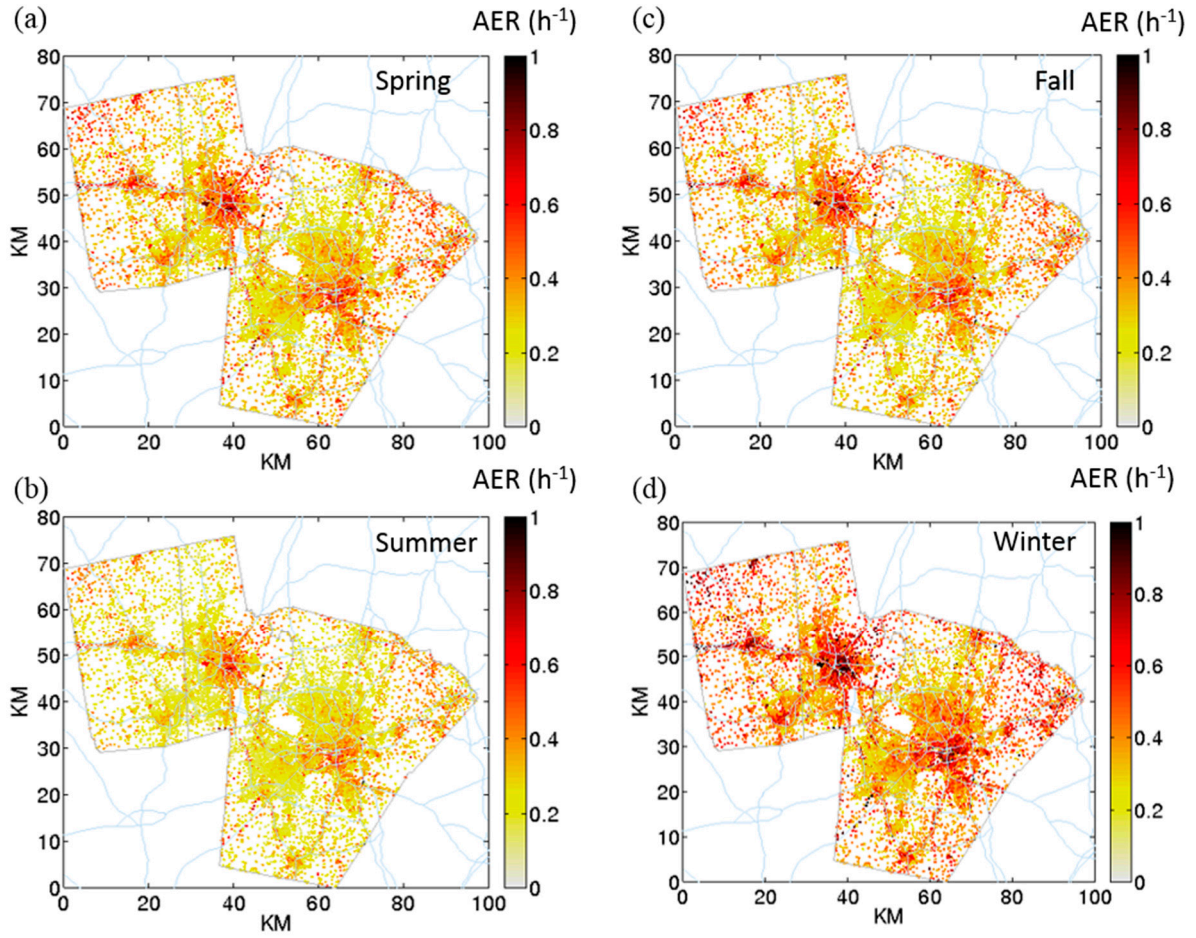

**Figure S3.** Spatial map for mean AER in (a) spring; (b) summer; (c) fall; and (d) winter. The color bar represents unit in ( $\text{h}^{-1}$ ).

**Table S1.** Stack coefficient  $k_s$  in  $\frac{\left(\frac{L}{s}\right)^2}{(\text{cm}^4 \cdot K)}$ .

|                   | House Height (Stories) |          |          |
|-------------------|------------------------|----------|----------|
|                   | One                    | Two      | Three    |
| Stack coefficient | 0.000145               | 0.000290 | 0.000435 |

**Table S2.** Wind coefficient  $k_w$  in  $\frac{\left(\frac{L}{s}\right)^2}{\left(\text{cm}^4 \cdot \left(\frac{m}{s}\right)^2\right)}$ .

| Shelter Class | Number of Stories |          |          |
|---------------|-------------------|----------|----------|
|               | One               | Two      | Three    |
| 1             | 0.000319          | 0.000420 | 0.000494 |
| 2             | 0.000246          | 0.000325 | 0.000382 |
| 3             | 0.000174          | 0.000231 | 0.000271 |
| 4             | 0.000104          | 0.000137 | 0.000161 |
| 5             | 0.000032          | 0.000042 | 0.000049 |

**Table S3.** Local sheltering for LBL model.

| <b>Shelter Class <sup>1</sup></b> | <b>Description <sup>1</sup></b>                                                                                                                                                                       | <b>Census Block House Density<br/>(House/1000 m<sup>2</sup>)</b> |
|-----------------------------------|-------------------------------------------------------------------------------------------------------------------------------------------------------------------------------------------------------|------------------------------------------------------------------|
| 1                                 | No obstructions or local shielding                                                                                                                                                                    | <0.025                                                           |
| 2                                 | Typical shelter for an isolated rural house                                                                                                                                                           | 0.025–0.03                                                       |
| 3                                 | Typical shelter caused by other buildings<br>across street from building under study                                                                                                                  | 0.03–0.5                                                         |
| 4                                 | Typical shelter for urban buildings on<br>larger lots where sheltering obstacles<br>are more than one building height away                                                                            | 0.5–1                                                            |
| 5                                 | Typical shelter produced by buildings or other<br>structures immediately adjacent(closer than<br>one building height): e.g., neighboring houses<br>on same side of street, trees, bushes, <i>etc.</i> | >1                                                               |

<sup>1</sup> ASHRAE Handbook-Fundamentals, 2009.

© 2015 by the authors; licensee MDPI, Basel, Switzerland. This article is an open access article distributed under the terms and conditions of the Creative Commons Attribution license (<http://creativecommons.org/licenses/by/4.0/>).
